# Supplementary material for: Integrated Analysis Reveals the Gut Microbial Metabolite TMAO Promotes Inflammatory Hepatocellular Carcinoma by Upregulating POSTN
Source: PubMed Central journal article supplement (PMC9167932; doi:10.3389/fcell.2022.840171), 2022-05-23
Supplement: Table1.pdf [file Table1.pdf]

**Table S1**

| Gene         |         | Primer sequences               |
|--------------|---------|--------------------------------|
| <i>Postn</i> | Forward | 5' GCCTTAGCGACCTCTACAAT 3'     |
|              | Reverse | 5' TAGCCGTCCGATACACAA 3'       |
| <i>Napb</i>  | Forward | 5' GTTACTGGGGCTAGAGATGCC 3'    |
|              | Reverse | 5' GGCCGTGAACAAAGCAGTAA 3'     |
| <i>Layn</i>  | Forward | 5' GTCAGGTCGACCACTTTCCC 3'     |
|              | Reverse | 5' TGAATTGGCTTTTGCAGGGTG 3'    |
| <i>Htra3</i> | Forward | 5' GCCAAGACTGGTCCCATGAA 3'     |
|              | Reverse | 5' GCCAAGGCTACCAATGGTCT 3'     |
| <i>Aanat</i> | Forward | 5' GCGCCACACACTCCCTGCCA 3'     |
|              | Reverse | 5' GCCCTTGCCCTGCTGCCGGAAG 3'   |
| <i>Afm</i>   | Forward | 5' CTGGCCATCATCGCGTTTTTC 3'    |
|              | Reverse | 5' AAGGGGTTTCCTTCTGGCAAC 3'    |
| <i>POSTN</i> | Forward | 5' GCGAGATCATCAAGCCAGCAGAG 3'  |
|              | Reverse | 5' ATGTCCAGTCTCCAGGTTGTGTCA 3' |
| <i>NAPB</i>  | Forward | 5' GGAAACGCATTTTGTCAAGCA 3'    |
|              | Reverse | 5' TTGCCCAACCTGCTCATAG 3'      |
| <i>LAYN</i>  | Forward | 5' ACAGAGCTGACAACACCTGTA 3'    |
|              | Reverse | 5' GATGTAGGCCAGATTCAAGGC 3'    |
| <i>HTRA3</i> | Forward | 5' CGTGGTGTCCAGCAACAGTGC 3'    |
|              | Reverse | 5' CCGTGTGATGCGGTCTGAGGG 3'    |
| <i>AANAT</i> | Forward | 5' CAAAATCAGAAGGGAACAGTA 3'    |
|              | Reverse | 5' TGGATGACAAATAGACAAGA 3'     |

|            |         |                           |
|------------|---------|---------------------------|
| <i>AFM</i> | Forward | 5' GTCACGAAGATAGCTCCCC 3' |
|            | Reverse | 5' AGCCTCCCTTTGGTGCTTT 3' |

---

All primer sequences are derived from primer pick(<https://www.ncbi.nlm.nih.gov/tools/primer-blast/>).
